# Supplementary material for: Analisis Pertumbuhan dan Proses Transformasi Struktur Ekonomi Regional Kota Medan
Source: Royal Society of Chemistry journal article supplement (doi:10.1039/d4cp03015j), 2007-08-30
Supplement: d4cp03015j1.pdf [file d4cp03015j1.pdf]

## Supplementary Material

### Photoelectron spectrum and breakdown diagram of ethanolamine: conformers, excited states, and thermochemistry

**S. Kechoindi,<sup>1,2</sup> S. Ben Yaghlane,<sup>2</sup> M. Mogren Al Mogren,<sup>3</sup> A. Bodi,<sup>4,\*</sup> and M. Hochlaf<sup>2,\*</sup>**

1. Université Gustave Eiffel, COSYS/IMSE, 5 Bd Descartes 77454, Champs-sur-Marne, France.
2. Laboratoire de Spectroscopie Atomique, Moléculaire et Applications – LSAMA, Université de Tunis El Manar, Tunis, Tunisia.
3. Department of Chemistry, College of Sciences, King Saud University, P.O. Box 2455, Riyadh 11451, Saudi Arabia.
4. Laboratory for Synchrotron Radiation and Femtochemistry, Paul Scherrer Institute, CH-5232 Villigen, PSI, Switzerland.

Figure S1: Low lying ethanolamine neutral structures as calculated at the CCSD(T)-F12/cc-pVDZ-F12 level.

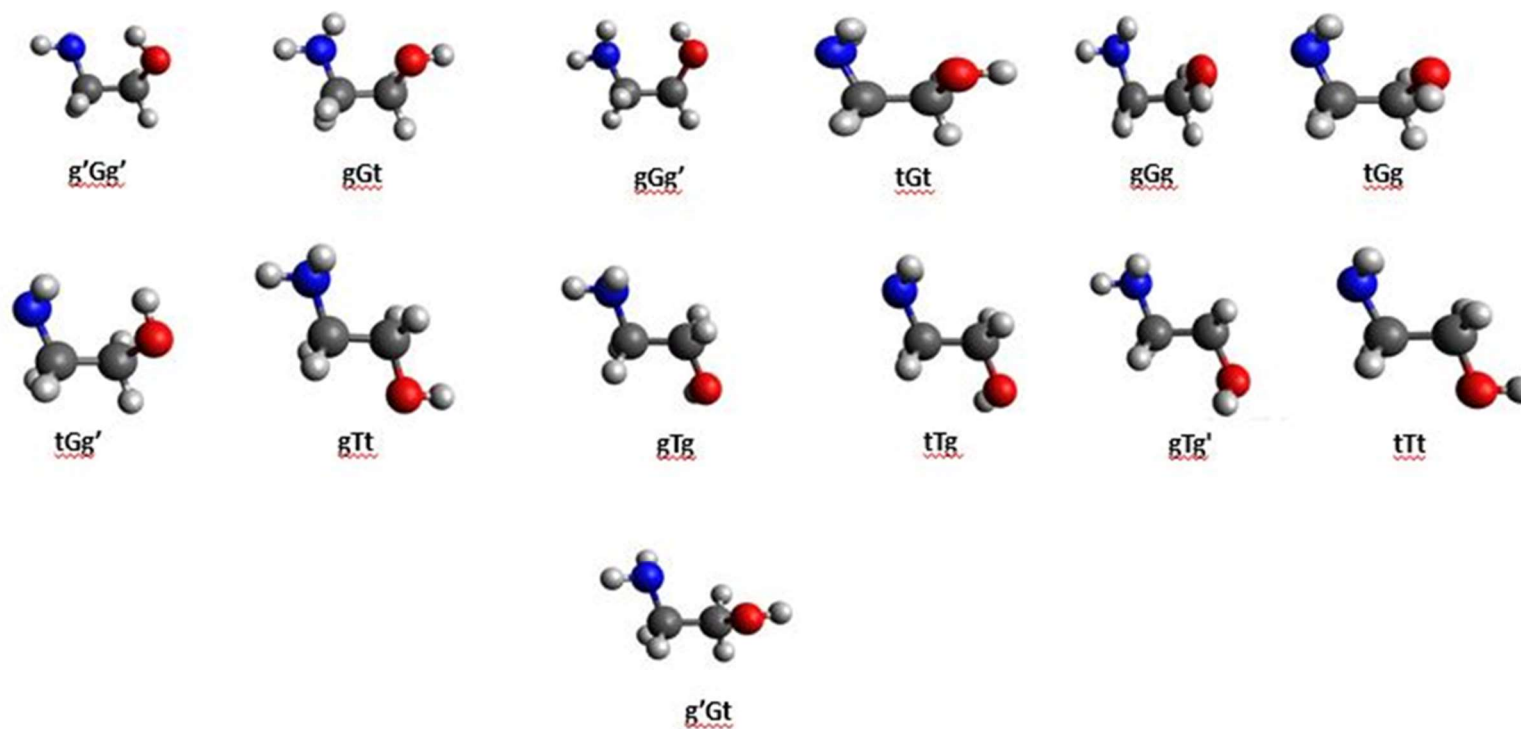

**Figure S2:** Numbering of atoms of ethanolamine.

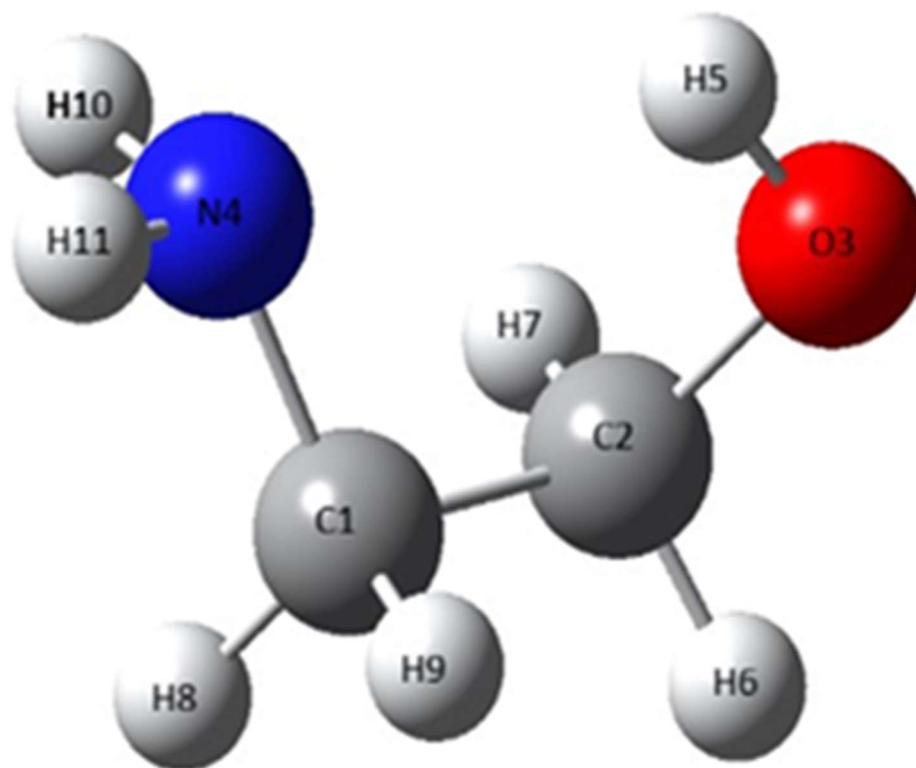

**Table S1:** Total energies (in Hartree) of ethanolamine. ZPE (in kJ/mol) is evaluated at the PBE0/aug-cc-pVDZ level using the corresponding anharmonic frequencies. respectively PBE0 and CCSD(T)-F12 computations correspond to optimization and the other computations are single point computations.

|                                  | <b>g'Gg'</b>                                                                        | <b>gGt</b>                                                                           | <b>gGg'</b>                                                                          | <b>tGt</b>                                                                           |
|----------------------------------|-------------------------------------------------------------------------------------|--------------------------------------------------------------------------------------|--------------------------------------------------------------------------------------|--------------------------------------------------------------------------------------|
|                                  | 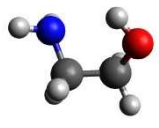  |   |   |   |
| ZPVE/ PBE0/aug-cc-pVDZ           | 255.57                                                                              | 254.27                                                                               | 251.58                                                                               | 254.11                                                                               |
| (R)CCSD(T)-F12/cc-pVDZ-F12 (opt) | -210.12270758                                                                       | -210.12004863                                                                        | -210.12009434                                                                        | -210.11966974                                                                        |
| (R)CCSD(T,fc)/cc-pwCVTZ          | -210.27785399                                                                       | -210.27482940                                                                        | -210.27500355                                                                        | -210.27456167                                                                        |
| (R)CCSD(T,full)/cc-pwCVTZ        | -210.07709168                                                                       | -210.07412080                                                                        | -210.07430168                                                                        | -210.07386645                                                                        |
| (R)CCSD(T)/cc-pVTZ               | -210.06477529                                                                       | -210.06184915                                                                        | -210.06196197                                                                        | -210.06155775                                                                        |
| (R)CCSD(T)cc-pVTZ-DK             | -210.05665429                                                                       | -210.05371743                                                                        | -210.05382531                                                                        | -210.05342354                                                                        |
|                                  | <b>gGg</b>                                                                          | <b>tGg</b>                                                                           | <b>tGg'</b>                                                                          | <b>gTt</b>                                                                           |
|                                  |  |  |  |  |
| ZPVE/ PBE0/aug-cc-pVDZ (kJ/mol)  | 254.398                                                                             | 254.273                                                                              | 253.633                                                                              | 253.830                                                                              |
| (R)CCSD(T)-F12/cc-pVDZ-F12(opt)  | -210.11938247                                                                       | -210.11935552                                                                        | -210.11865107                                                                        | -210.11757480                                                                        |
| (R)CCSD(T,fc)/cc-pwCVTZ          | -210.27441875                                                                       | -210.27459518                                                                        | -210.27361161                                                                        | -210.27232322                                                                        |
| (R)CCSD(T,full)/cc-pwCVTZ        | -210.07372343                                                                       | -210.07391597                                                                        | -210.07291927                                                                        | -210.07162591                                                                        |
| (R)CCSD(T)/cc-pVTZ               | -210.06141445                                                                       | -210.06155775                                                                        | -210.06055637                                                                        | -210.05935476                                                                        |

|                                 |                                                                                   |                                                                                     |                                                                                     |                                                                                     |
|---------------------------------|-----------------------------------------------------------------------------------|-------------------------------------------------------------------------------------|-------------------------------------------------------------------------------------|-------------------------------------------------------------------------------------|
| (R)CCSD(T)cc-pVTZ-DK            | -210.05328252                                                                     | -210.05344511                                                                       | -210.05242176                                                                       | -210.05122048                                                                       |
|                                 | <b>gTg</b>                                                                        | <b>tTg</b>                                                                          | <b>gTg'</b>                                                                         | <b>tTt</b>                                                                          |
|                                 | 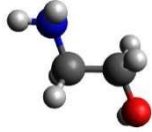 |  |  |  |
| ZPVE/ PBE0/aug-cc-pVDZ          | 253.974                                                                           | 253.341                                                                             | 253.511                                                                             | 253.438                                                                             |
| (R)CCSD(T)-F12/cc-pVDZ-F12(opt) | -210.11763143                                                                     | -210.11786516                                                                       | -210.11751911                                                                       | -210.11777099                                                                       |
| (R)CCSD(T,fc)/cc-pwCVTZ         | -210.27246932                                                                     | -210.27290691                                                                       | -210.27231952                                                                       | -210.27259414                                                                       |
| (R)CCSD(T,full)/cc-pwCVTZ       | -210.07178449                                                                     | -210.07223397                                                                       | -210.07163455                                                                       | -210.07190694                                                                       |
| (R)CCSD(T)/cc-pVTZ              | -210.05947930                                                                     | -210.05989634                                                                       | -210.05931584                                                                       | -210.05961248                                                                       |
| (R)CCSD(T)cc-pVTZ-DK            | -210.05134551                                                                     | -210.05176426                                                                       | -210.05118174                                                                       | -210.05148037                                                                       |
|                                 | <b>g'Gt</b>                                                                       |                                                                                     |                                                                                     |                                                                                     |
|                                 |  |                                                                                     |                                                                                     |                                                                                     |
| ZPVE/ PBE0/aug-cc-pVDZ          | 252.29                                                                            |                                                                                     |                                                                                     |                                                                                     |
| (R)CCSD(T)-F12/cc-pVDZ-F12(opt) | -210.11494020                                                                     |                                                                                     |                                                                                     |                                                                                     |
| (R)CCSD(T,fc)/cc-pwCVTZ         | -210.26938334                                                                     |                                                                                     |                                                                                     |                                                                                     |
| (R)CCSD(T,full)/cc-pwCVTZ       | -210.06869892                                                                     |                                                                                     |                                                                                     |                                                                                     |
| (R)CCSD(T)/cc-pVTZ              | -210.05640091                                                                     |                                                                                     |                                                                                     |                                                                                     |
| (R)CCSD(T)cc-pVTZ-DK            | -210.04827060                                                                     |                                                                                     |                                                                                     |                                                                                     |

**Table S2:** Geometrical parameters (distances are in Å and angles in degree) of the 13 low lying neutral conformers of ethanolamine in their ground state as computed at the CCSD(T)-F12/cc-pVDZ-F12 level. See Figure S2 for the numbering of the atoms.

| Parameters | g'Gg'            | tGt   | gGt   | tGg   | tGg'  | gGg   | gGg'  | tTg   | gTg   | tTt   | gTt   | gTg'  | g'Gt  | Experiment <sup>a</sup><br>(g'Gg') | Theory <sup>b</sup><br>(g'Gg') |
|------------|------------------|-------|-------|-------|-------|-------|-------|-------|-------|-------|-------|-------|-------|------------------------------------|--------------------------------|
|            | <b>Distances</b> |       |       |       |       |       |       |       |       |       |       |       |       |                                    |                                |
| C1C2       | 1.516            | 1.514 | 1.507 | 1.518 | 1.518 | 1.516 | 1.519 | 1.521 | 1.521 | 1.521 | 1.511 | 1.521 | 1.516 | 1.526±0.016                        | 1.522                          |
| C1N4       | 1.458            | 1.450 | 1.452 | 1.450 | 1.451 | 1.426 | 1.469 | 1.451 | 1.464 | 1.460 | 1.454 | 1.463 | 1.463 | 1.475±0.023                        | 1.459                          |
| C2O3       | 1.405            | 1.416 | 1.418 | 1.416 | 1.413 | 1.460 | 1.421 | 1.412 | 1.421 | 1.422 | 1.414 | 1.420 | 1.419 | 1.396±0.01                         | 1.395                          |
| O3H5       | 0.964            | 0.956 | 0.956 | 0.958 | 0.958 | 0.96  | 0.961 | 0.958 | 0.959 | 0.958 | 0.956 | 0.959 | 0.958 | 1.139±0.001                        | 0.950                          |
| C2H6       | 1.095            | 1.101 | 1.1   | 1.101 | 1.096 | 1.095 | 1.091 | 1.103 | 1.094 | 1.097 | 1.099 | 1.089 | 1.096 |                                    | 1.083                          |
| C2H7       | 1.104            | 1.102 | 1.099 | 1.096 | 1.103 | 1.090 | 1.095 | 1.096 | 1.092 | 1.097 | 1.102 | 1.097 | 1.097 |                                    | 1.091                          |
| C1H8       | 1.101            | 1.097 | 1.097 | 1.098 | 1.098 | 1.093 | 1.092 | 1.096 | 1.096 | 1.091 | 1.101 | 1.1   | 1.098 |                                    | 1.084                          |
| C1H9       | 1.096            | 1.097 | 1.103 | 1.10  | 1.096 | 1.101 | 1.095 | 1.099 | 1.094 | 1.091 | 1.096 | 1.091 | 1.092 |                                    | 1.091                          |
| N4H10      | 1.013            | 1.014 | 1.012 | 1.014 | 1.013 | 1.012 | 1.011 | 1.013 | 1.013 | 1.013 | 1.013 | 1.013 | 1.013 | 1.017±0.005                        | 1.001                          |
| N4H11      | 1.011            | 1.014 | 1.013 | 1.014 | 1.012 | 1.013 | 1.012 | 1.013 | 1.012 | 1.013 | 1.011 | 1.011 | 1.012 | 1.017±0.003                        | 1.002                          |
|            | <b>Angles</b>    |       |       |       |       |       |       |       |       |       |       |       |       |                                    |                                |
| C1C2O3     | 110.8            | 107.6 | 107.4 | 112.1 | 112.9 | 111.6 | 111.3 | 112.9 | 112.3 | 107.7 | 107.8 | 112.2 | 108.7 | 112.1±0.1                          | 108.9                          |
| N4C1C2     | 108.3            | 115.3 | 109.7 | 115.2 | 115.8 | 109.3 | 109.2 | 114.8 | 109.2 |       | 109.5 | 109.3 | 111.1 | 108.1±2.0                          | 111.2                          |
| H5O3C2     | 105.0            | 109.2 | 109.1 | 108.4 | 108.2 | 107.8 | 106.2 | 108.6 | 108.0 | 108.6 | 108.9 | 108.1 | 108.4 | 103.7±0.2                          | 106.2                          |
| H6C2C1     | 110.4            | 109.7 | 109.8 | 110.2 | 109.2 | 110.3 | 110.5 | 109.7 | 109.5 | 109.6 | 109.2 | 109.5 | 109.1 |                                    | 110.3                          |

|           |        |                        |        |        |        |        |       |       |       |        |       |        |        |           |        |  |
|-----------|--------|------------------------|--------|--------|--------|--------|-------|-------|-------|--------|-------|--------|--------|-----------|--------|--|
| H7C2C1    | 109.5  | 109.8                  | 109.2  | 110.1  | 109.9  | 109.5  | 109.5 | 109.8 | 109.8 | 109.5  | 109.5 | 109.7  | 109.3  |           | 109.5  |  |
| H8C1C2    | 109.8  | 108.8                  | 108.3  | 109.0  | 108.5  | 108.8  | 108.8 | 109.0 | 108.6 | 108.8  | 108.4 | 108.9  | 108.0  |           | 108.6  |  |
| H9C1C2    | 108.7  | 108.4                  | 108.2  | 108.9  | 109.0  | 108.5  | 109.4 | 109.3 | 109.1 | 108.8  | 108.5 | 108.7  | 107.9  | 110.4±0.8 | 109.9  |  |
| H10N4C1   | 110.9  | 110.3                  | 110.8  | 110.1  | 111.8  | 110.8  | 110.6 | 110.8 | 110.1 | 110.5  | 110.6 | 110.3  | 110.1  | 111.3±0.8 | 111.4  |  |
| H11N4C1   | 111.6  | 109.1                  | 109.0  | 109.1  | 111.6  | 108.9  | 109.8 | 111.0 | 110.4 | 110.5  | 110.7 | 110.5  | 110.4  |           | 111.0  |  |
| H8C1N4    | 107.9  | 109.0                  | 108.9  | 109.0  | 108.5  | 109.0  | 108.9 | 110.8 | 114.5 | 108.8  | 114.5 | 113.9  | 113.7  |           | 107.9  |  |
| H9C1N4    | 114.2  | 108.1                  | 114.0  | 108.2  | 107.8  | 113.9  | 112.7 | 111.0 | 108.5 | 108.8  | 108.6 | 108.7  | 108.3  |           | 113.6  |  |
| H6C2O3    | 107.8  | 110.9                  | 110.7  | 111.0  | 106.0  | 110.8  | 106.5 | 111.1 | 111.7 | 111.0  | 111.7 | 106.5  | 110.7  |           | 107.5  |  |
| H7C2O3    | 110.7  | 110.6                  | 110.7  | 105.0  | 110.6  | 105.7  | 110.4 | 105.8 | 105.8 | 111.0  | 110.8 | 111.0  | 110.9  |           | 110.8  |  |
|           |        | <b>Dihedral angles</b> |        |        |        |        |       |       |       |        |       |        |        |           |        |  |
| O3C2C1N4  | 55.0   | 60.6                   | 64.7   | 58.3   | 61.1   | 62.7   | 55.1  | 178.4 | 177.6 | 180.0  | 177.9 | -179.6 | 72.7   | 55.4± 2   | 57.4   |  |
| H5O3C2C1  | -39.3  | -177.0                 | -170.4 | 69.1   | -67.4  | 70.3   | -68.6 | 62.4  | 68.1  | -180.0 | 176.9 | -63.7  | -170.4 | 28.3± 2   | -43.3  |  |
| H6C2C1N4  | 174.4  | -178.7                 | -55.4  | -177.5 | 179.1  | -173.6 | 173.3 | -57.0 | -57.7 | -59.2  | -60.6 | -61.5  | -166.6 | 40.7± 1   | 176.6  |  |
| H7C2C1N4  | -67.3  | -59.8                  | -176.5 | -58.8  | -62.9  | -54.0  | -96.1 | 60.6  | 60.3  | 59.1   | 57.3  | 56.5   | -48.6  |           | -65.4  |  |
| H8C1C2O3  | -179.7 | -176.6                 | -176.5 | -178.9 | -176.8 | -178.4 | 173.8 | 56.1  | 52.2  | 58.1   | 52.4  | 55.4   | -162.0 |           | -60.0  |  |
| H9C1C2O3  | -61.9  | -60.8                  | -60.2  | -63.4  | -60.6  | -62.0  | -68.6 | -59.8 | -64.6 | -58.2  | -63.7 | -61.2  | -46.0  |           | -177.6 |  |
| H11N4C1C2 | -163.2 | -53.9                  | -59.4  | -49.4  | -66.5  | -55.1  | -88.6 | 57.6  | 172.1 | 58.9   | 169.5 | 171.3  | -169.0 | -78.2±2   | -163.0 |  |
| H10N4C1C2 | 77.5   | 62.6                   | -176.8 | 66.5   | 54.6   | -172.7 | 154.5 | -60.8 | -70.9 | -58.9  | -72.8 | -71.1  | 73.7   | 159.5±1   | 77.7   |  |

- a) Geometry parameters were determined by microwave spectroscopy (Penn et al; 1971).
- b) Geometry parameters were optimized at the MP2/6-31G\* level (Vanquickenborne et al; 1988).

**Table S3:** Relative energies ( $E_r$ , eV) of ethanolamine with respect to the **g'Gg'** conformer ground state.  $\Delta ZPVE$  (in eV) is evaluated at the PBE0/aug-cc-pVDZ using the corresponding anharmonic frequencies (Table S4).  $\Delta CV$ ,  $\Delta SR$  are the core-valence and scalar relativistic corrections, respectively. The room-temperature abundances are calculated assuming conformer independent thermal internal energies and entropies.

|                                                                                 |              |             |             |             |
|---------------------------------------------------------------------------------|--------------|-------------|-------------|-------------|
|                                                                                 | <b>g'Gg'</b> | <b>gGt</b>  | <b>gGg'</b> | <b>tGt</b>  |
| $E_r$ @CCSD(T)-F12/cc-pVDZ-F12(opt)                                             | 0            | 0.072       | 0.071       | 0.083       |
| $\Delta CV$                                                                     | 0            | -0.00146152 | -0.00164466 | -0.00182561 |
| $\Delta SR$                                                                     | 0            | 0.000291706 | 0.000426131 | 0.000359463 |
| $\Delta ZPVE$                                                                   | 0            | -0.013      | -0.0399     | -0.0146     |
| $E_r$ @CCSD(T)-F12/cc-pVDZ-F12(opt) + $\Delta CV$ + $\Delta SR$ + $\Delta ZPVE$ | 0            | 0.058       | 0.030       | 0.066       |
| Approx. abundance at room temperature                                           | 55%          | 6%          | 17%         | 4%          |
|                                                                                 | <b>gGg</b>   | <b>tGg</b>  | <b>tGg'</b> | <b>gTt</b>  |
| $E_r$ @CCSD(T)-F12/cc-pVDZ-F12(opt)                                             | 0.090        | 0.091       | 0.110       | 0.140       |
| $\Delta CV$                                                                     | -0.00182289  | -0.00226127 | -0.00190398 | -0.00176874 |
| $\Delta SR$                                                                     | 0.000297421  | -0.00022749 | 0.000370347 | 0.000361367 |
| $\Delta ZPVE$                                                                   | -0.01172     | -0.01297    | -0.01937    | -0.0174     |
| $E_r$ @CCSD(T)-F12/cc-pVDZ-F12(opt) + $\Delta CV$ + $\Delta SR$ + $\Delta ZPVE$ | 0.077        | 0.076       | 0.089       | 0.121       |
| Approx. abundance at room temperature                                           | 3%           | 3%          | 2%          | 0%          |
|                                                                                 | <b>gTg</b>   | <b>tTg</b>  | <b>gTg'</b> | <b>tTt</b>  |
| $E_r$ @CCSD(T)-F12/cc-pVDZ-F12(opt)                                             | 0.066        | 0.132       | 0.141       | 0.134       |
| $\Delta CV$                                                                     | -0.00210834  | -0.00243188 | -0.00210453 | -0.00204385 |
| $\Delta SR$                                                                     | 0.000348034  | 0.000301502 | 0.000356469 | 0.000302319 |
| $\Delta ZPVE$                                                                   | -0.01596     | -0.02229    | -0.02059    | -0.02132    |



|                                                                                 |             |       |       |       |
|---------------------------------------------------------------------------------|-------------|-------|-------|-------|
| $E_r$ @CCSD(T)-F12/cc-pVDZ-F12(opt) + $\Delta CV$ + $\Delta SR$ + $\Delta ZPVE$ | 0.048       | 0.107 | 0.119 | 0.111 |
| Approx. abundance at room temperature                                           | 8%          | 1%    | 1%    | 1%    |
|                                                                                 | <b>g'Gt</b> |       |       |       |
| $E_r$ @CCSD(T)-F12/cc-pVDZ-F12(opt)                                             | 0.211       |       |       |       |
| $\Delta CV$                                                                     | -0.0021195  |       |       |       |
| $\Delta SR$                                                                     | 0.000253338 |       |       |       |
| $\Delta ZPVE$                                                                   | -0.0328     |       |       |       |
| $E_r$ @CCSD(T)-F12/cc-pVDZ-F12(opt) + $\Delta CV$ + $\Delta SR$ + $\Delta ZPVE$ | 0.177       |       |       |       |
| Approx. abundance at room temperature                                           | 0%          |       |       |       |

**Table S4:** Anrhamonic frequencies ( $\nu_i$  in  $\text{cm}^{-1}$ ) as computed at the CCSD(T)-F12/cc-pVDZ-F12//PBE0/aug-cc-pVDZ level for the low-lying conformers of ethanolamine.

|                 | g'Gg' | tGt  | gGt  | tGg  | tGg' | gGg  | tTg  | gTg  | tTt  | gTt  | gTg' | g'Gt | Theo <sup>a)</sup> | Exp <sup>a)</sup> |
|-----------------|-------|------|------|------|------|------|------|------|------|------|------|------|--------------------|-------------------|
| v <sub>1</sub>  | 3567  | 3696 | 3682 | 3668 | 3663 | 3669 | 3659 | 3683 | 3689 | 3732 | 3646 | 3665 | 3575               | 3567.8            |
| v <sub>2</sub>  | 3403  | 3405 | 3421 | 3398 | 3412 | 3412 | 3407 | 3421 | 3409 | 3413 | 3416 | 3419 | 3432               | 3430              |
| v <sub>3</sub>  | 3334  | 3334 | 3352 | 3331 | 3335 | 3339 | 3339 | 3352 | 3341 | 3341 | 3343 | 3345 | 3357               |                   |
| v <sub>4</sub>  | 2934  | 2947 | 2936 | 2949 | 2966 | 2967 | 2962 | 2951 | 2960 | 2914 | 2973 | 2943 | 2959               |                   |
| v <sub>5</sub>  | 2946  | 2923 | 2920 | 2926 | 2939 | 2922 | 2937 | 2924 | 2940 | 2880 | 2947 | 2887 | 2950               |                   |
| v <sub>6</sub>  | 2866  | 2886 | 2845 | 2894 | 2916 | 2913 | 2903 | 2866 | 2880 | 2792 | 2840 | 2922 | 2844               |                   |
| v <sub>7</sub>  | 2865  | 2842 | 2834 | 2898 | 2896 | 2802 | 2841 | 2838 | 2848 | 2810 | 2813 | 2825 | 2835               |                   |
| v <sub>8</sub>  | 1512  | 1591 | 1579 | 1594 | 1633 | 1626 | 1637 | 1650 | 1636 | 1662 | 1646 | 1649 | 1622               | 1625              |
| v <sub>9</sub>  | 1485  | 1480 | 1479 | 1472 | 1471 | 1471 | 1484 | 1492 | 1494 | 1502 | 1503 | 1476 | 1469               |                   |
| v <sub>10</sub> | 1468  | 1452 | 1469 | 1453 | 1453 | 1470 | 1461 | 1469 | 1462 | 1485 | 1461 | 1462 | 1457               | 1463              |
| v <sub>11</sub> | 1414  | 1420 | 1428 | 1399 | 1408 | 1406 | 1414 | 1412 | 1430 | 1433 | 1413 | 1424 | 1403               | 1397              |
| v <sub>12</sub> | 1381  | 1368 | 1388 | 1366 | 1342 | 1383 | 1356 | 1362 | 1350 | 1379 | 1354 | 1393 | 1373               | 1376              |
| v <sub>13</sub> | 1342  | 1361 | 1313 | 1355 | 1354 | 1344 | 1342 | 1328 | 1332 | 1320 | 1339 | 1316 | 1341               | 1343              |
| v <sub>14</sub> | 1300  | 1282 | 1253 | 1334 | 1332 | 1307 | 1309 | 1289 | 1288 | 1280 | 1298 | 1293 | 1293               | 1280              |
| v <sub>15</sub> | 1228  | 1222 | 1226 | 1234 | 1223 | 1179 | 1266 | 1255 | 1210 | 1221 | 1242 | 1230 | 1236               | 1232              |
| v <sub>16</sub> | 1162  | 1144 | 1159 | 1129 | 1144 | 1162 | 1124 | 1123 | 1184 | 1181 | 1141 | 1146 | 1166               | 1165              |
| v <sub>17</sub> | 1099  | 1101 | 1094 | 1094 | 1101 | 1105 | 1078 | 1091 | 1085 | 1105 | 1086 | 1092 | 1098               | 1093              |
| v <sub>18</sub> | 1048  | 1062 | 1065 | 1068 | 1050 | 1038 | 1060 | 1061 | 1048 | 1085 | 1057 | 1058 | 1045               | 1049              |
| v <sub>19</sub> | 989   | 1001 | 1023 | 982  | 986  | 1030 | 1022 | 1037 | 1003 | 1055 | 1037 | 976  | 986                |                   |
| v <sub>20</sub> | 905   | 889  | 888  | 873  | 862  | 885  | 969  | 954  | 984  | 962  | 960  | 910  | 901                | 901               |
| v <sub>21</sub> | 869   | 835  | 858  | 855  | 851  | 850  | 773  | 812  | 771  | 838  | 805  | 861  | 869                | 880               |
| v <sub>22</sub> | 786   | 811  | 823  | 808  | 727  | 796  | 774  | 778  | 783  | 781  | 773  | 753  | 787                | 774               |
| v <sub>23</sub> | 390   | 499  | 499  | 508  | 501  | 501  | 461  | 468  | 461  | 474  | 470  | 488  | 497                | 463               |
| v <sub>4</sub>  | 592   | 324  | 411  | 458  | 359  | 492  | 251  | 455  | 347  | 327  | 478  | 314  | 495                | 530               |
| v <sub>25</sub> | 321   | 394  | 267  | 133  | 295  | 203  | 336  | 72   | 280  | 223  | 13   | 60   | 318                |                   |
| v <sub>26</sub> | 235   | 61   | 72   | 249  | 179  | 157  | 125  | 221  | 86   | 99   | 186  | 202  | 237                | 210               |
| v <sub>27</sub> | 174   | 159  | 169  | 176  | 167  | 168  | 146  | 137  | 138  | 113  | 139  | 48   | 175                |                   |

a) Theoretical and experimental IR spectroscopic study. Ref. (Asselin et al; 2016).

**Table S5:** Geometrical parameters of the 4 low-lying isomers of the ethanolamine cations as computed at the RCCSD(T)-F12/cc-pVDZ-f12 level. Distances are in Å and angles in degrees. See Figure S2 for the numbering of the atoms.

| Structures      | EtA1 <sup>+</sup> | EtA2 <sup>+</sup> | EtA3 <sup>+</sup> | EtA4 <sup>+</sup> |
|-----------------|-------------------|-------------------|-------------------|-------------------|
| Distances       |                   |                   |                   |                   |
| C1C2            | 1.531             | 1.808             | 1.531             | 1.789             |
| C1N4            | 1.424             | 1.351             | 1.424             | 1.354             |
| C2O3            | 1.414             | 1.339             | 1.414             | 1.342             |
| O3H5            | 0.961             | 0.964             | 0.961             | 0.964             |
| C2H6            | 1.090             | 1.088             | 1.090             | 1.087             |
| C2H7            | 1.093             | 1.088             | 1.093             | 1.086             |
| C1H8            | 1.090             | 1.087             | 1.090             | 1.088             |
| C1H9            | 1.109             | 1.086             | 1.109             | 1.088             |
| N4H10           | 1.017             | 1.010             | 1.017             | 1.010             |
| N4H11           | 1.024             | 1.010             | 1.024             | 1.010             |
| Angles          |                   |                   |                   |                   |
| C1C2O3          | 104.1             | 110.0             | 104.1             | 110.0             |
| N4C1C2          | 109.2             | 111.5             | 109.2             | 111.4             |
| H5O3C2          | 110.8             | 111.9             | 110.8             | 111.8             |
| H6C2C1          | 108.9             | 96.9              | 108.9             | 100.0             |
| H7C2C1          | 109.8             | 103.5             | 109.8             | 99.1              |
| H8C1C2          | 115.4             | 99.2              | 115.4             | 104.0             |
| H9C1C2          | 109.0             | 98.2              | 109.0             | 97.3              |
| H10N4C1         | 122.9             | 121.5             | 122.9             | 121.2             |
| H11N4C1         | 116.9             | 121.2             | 116.9             | 121.4             |
| H8C1N4          | 110.5             | 114.2             | 104.5             | 114.0             |
| H9C1N4          | 104.5             | 114.3             | 110.5             | 114.1             |
| H6C2O3          | 112.8             | 111.6             | 112.8             | 111.4             |
| H7C2O3          | 111.8             | 117.0             | 111.8             | 117.0             |
| Dihedral angles |                   |                   |                   |                   |
| O3C2C1N4        | 38.6              | 67.9              | 38.6              | -69               |
| H5O3C2C1        | 173.2             | -99.1             | 173.2             | 100               |
| H6C2C1N4        | 159.1             | -176.1            | 159.2             | 175               |

|           |       |        |       |     |
|-----------|-------|--------|-------|-----|
| H7C2C1N4  | -81.1 | -57.8  | -81.1 | 57  |
| H8C1C2O3  | 163.9 | -171.3 | 163.9 | 170 |
| H9C1C2O3  | -75.0 | -52.3  | -75.0 | 52  |
| H11N4C1C2 | -26.7 | 89.0   | -26.7 | -89 |
| H10N4C1C2 | 158.7 | -87.0  | 158.8 | 87  |

**Table S6:** Total energies (in Hartree) of low-lying forms of the ethanolamine cation. ZPE (in kJ/mol) is evaluated at the PBE0/aug-cc-pVDZ level using the corresponding anharmonic frequencies respectively PBE0 and CCSD(T)-F12/cc-pVDZ-F12 computations correspond to optimization and the other computations are single point computations.

|                                 | EtA1 <sup>+</sup>                                                                  | EtA2 <sup>+</sup>                                                                   | EtA3 <sup>+</sup>                                                                   | EtA4 <sup>+</sup>                                                                   |
|---------------------------------|------------------------------------------------------------------------------------|-------------------------------------------------------------------------------------|-------------------------------------------------------------------------------------|-------------------------------------------------------------------------------------|
|                                 | 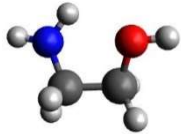 |  |  |  |
| ZPVE/ PBE0/aug-cc-pVDZ (kJ/mol) | 248.151                                                                            | 251.671                                                                             | 252.001                                                                             | 251.465                                                                             |
| (R)CCSD(T)-F12/cc-pVDZ-F12(opt) | -209.79684731                                                                      | -209.79348114                                                                       | -209.79343227                                                                       | -209.79412874                                                                       |
| (R)CCSD(T,fc)/cc-pwCVTZ         | -209.95719056                                                                      | -209.95391877                                                                       | -209.95409055                                                                       | -209.95392140                                                                       |
| (R)CCSD(T,full)/cc-pwCVTZ       | -209.75646365                                                                      | -209.75335792                                                                       | -209.75354931                                                                       | -209.75336136                                                                       |
| (R)CCSD(T)/cc-pVTZ              | -209.74435627                                                                      | -209.74106572                                                                       | -209.74127728                                                                       | -209.74107010                                                                       |
| (R)CCSD(T)cc-pVTZ-DK            | -209.73624397                                                                      | -209.73296428                                                                       | -209.73317679                                                                       | -209.73296865                                                                       |

**Table S7:** Harmonic frequencies (in  $\text{cm}^{-1}$ ) evaluated at the CCSD(T)-F12/cc-pVDZ-F12 level of the four lowest conformers of the ethanolamine cation.

| Structures    | EtA1 <sup>+</sup> | EtA2 <sup>+</sup> | EtA3 <sup>+</sup> | EtA4 <sup>+</sup> |
|---------------|-------------------|-------------------|-------------------|-------------------|
| $\omega_1$    | 3851              | 3794              | 3784              | 3799              |
| $\omega_2$    | 3570              | 3664              | 3660              | 3671              |
| $\omega_3$    | 3408              | 3547              | 3544              | 3553              |
| $\omega_4$    | 3121              | 3209              | 3219              | 3214              |
| $\omega_5$    | 3119              | 3191              | 3200              | 3183              |
| $\omega_6$    | 3056              | 3101              | 3108              | 3103              |
| $\omega_7$    | 2892              | 3084              | 3091              | 3086              |
| $\omega_8$    | 1563              | 1690              | 1682              | 1690              |
| $\omega_9$    | 1539              | 1551              | 1538              | 1549              |
| $\omega_{10}$ | 1441              | 1516              | 1511              | 1513              |
| $\omega_{11}$ | 1410              | 1430              | 1406              | 1427              |
| $\omega_{12}$ | 1384              | 1399              | 1396              | 1404              |
| $\omega_{13}$ | 1277              | 1355              | 1343              | 1353              |
| $\omega_{14}$ | 1251              | 1300              | 1283              | 1298              |
| $\omega_{15}$ | 1206              | 1255              | 1271              | 1260              |
| $\omega_{16}$ | 1122              | 1240              | 1219              | 1226              |
| $\omega_{17}$ | 1083              | 1152              | 1159              | 1168              |
| $\omega_{18}$ | 1062              | 1068              | 1068              | 1069              |
| $\omega_{19}$ | 1010              | 905               | 902               | 893               |
| $\omega_{20}$ | 890               | 855               | 829               | 857               |
| $\omega_{21}$ | 790               | 653               | 682               | 636               |
| $\omega_{22}$ | 710               | 596               | 605               | 597               |
| $\omega_{23}$ | 536               | 494               | 495               | 495               |
| $\omega_{24}$ | 335               | 438               | 413               | 414               |
| $\omega_{25}$ | 318               | 383               | 337               | 396               |
| $\omega_{26}$ | 249               | 246               | 266               | 243               |
| $\omega_{27}$ | 153               | 137               | 79                | 134               |

**Table S8:** Anharmonic frequencies (in  $\text{cm}^{-1}$ ) evaluated at the PBE0/aug-cc-pVDZ level of the four lowest isomers of the ethanolamine cation.

| Structures      | EtA1 <sup>+</sup> | EtA2 <sup>+</sup> | EtA3 <sup>+</sup> | EtA4 <sup>+</sup> |
|-----------------|-------------------|-------------------|-------------------|-------------------|
| v <sub>1</sub>  | 3791              | 3780              | 3727              | 3780              |
| v <sub>2</sub>  | 3540              | 3623              | 3597              | 3632              |
| v <sub>3</sub>  | 3348              | 3519              | 3495              | 3527              |
| v <sub>4</sub>  | 3088              | 3190              | 3177              | 3198              |
| v <sub>5</sub>  | 3026              | 3182              | 3154              | 3172              |
| v <sub>6</sub>  | 2810              | 3099              | 3091              | 3118              |
| v <sub>7</sub>  | 1630              | 3088              | 3069              | 3086              |
| v <sub>8</sub>  | 1551              | 1756              | 1729              | 1757              |
| v <sub>9</sub>  | 1485              | 1589              | 1565              | 1591              |
| v <sub>10</sub> | 1434              | 1572              | 1542              | 1568              |
| v <sub>11</sub> | 1410              | 1492              | 1456              | 1488              |
| v <sub>12</sub> | 1333              | 1453              | 1412              | 1461              |
| v <sub>13</sub> | 1314              | 1430              | 1369              | 1428              |
| v <sub>14</sub> | 1247              | 1370              | 1359              | 1371              |
| v <sub>15</sub> | 1214              | 1355              | 1307              | 1362              |
| v <sub>16</sub> | 1174              | 1296              | 1256              | 1289              |
| v <sub>17</sub> | 1127              | 1216              | 1216              | 1235              |
| v <sub>18</sub> | 1127              | 1179              | 1163              | 1177              |
| v <sub>19</sub> | 971               | 1050              | 1004              | 1044              |
| v <sub>20</sub> | 874               | 980               | 929               | 989               |
| v <sub>21</sub> | 794               | 665               | 759               | 801               |
| v <sub>22</sub> | 676               | 590               | 640               | 667               |
| v <sub>23</sub> | 453               | 563               | 551               | 574               |
| v <sub>4</sub>  | 444               | 457               | 472               | 551               |
| v <sub>25</sub> | 316               | 387               | 428               | 475               |
| v <sub>26</sub> | 205               | 287               | 402               | 377               |
| v <sub>27</sub> | 113               | 144               | 214               | 291               |

**Table S9:** Relative energies ( $E_r$ , eV) of ethanolamine cation most stable forms with respect to the **EtA1<sup>+</sup>** conformer ground state.  $\Delta ZPVE$  (in eV) is evaluated at the PBE0/aug-cc-pVDZ using the corresponding anharmonic frequencies (Table S8).  $\Delta CV$ ,  $\Delta SR$  are the core valence and scalar relativistic corrections, respectively.

|                                                                                  | <b>EtA1<sup>+</sup></b> | <b>EtA4<sup>+</sup></b> | <b>EtA2<sup>+</sup></b> | <b>EtA3<sup>+</sup></b> |
|----------------------------------------------------------------------------------|-------------------------|-------------------------|-------------------------|-------------------------|
| $E_r$ @RCCSD(T)-F12/cc-pVDZ-F12(opt)                                             | 0.000                   | 0.074                   | 0.092                   | 0.093                   |
| $\Delta CV$                                                                      | 0.000                   | -0.00454077             | -0.00451873             | -0.00505234             |
| $\Delta SR$                                                                      | 0.000                   | -0.00029524             | -0.00029552             | -0.00032137             |
| $\Delta ZPVE$                                                                    | 0.000                   | 0.03314                 | 0.0352                  | 0.0385                  |
| $E_r$ @RCCSD(T)-F12/cc-pVDZ-F12(opt) + $\Delta CV$ + $\Delta SR$ + $\Delta ZPVE$ | 0.000                   | 0.102                   | 0.122                   | 0.126                   |



**Table S10:** (R)CCSD(T)-F12/cc-pVDZ-F12 +  $\Delta CV$  +  $\Delta SR$  +  $\Delta ZPVE$  level ionization energies in eV for transitions from the **g'Gg'**, **gGt**, **gGg'** neutral structures to the five cationic structures.

| <b>AIE</b>   | <b>EtA1<sup>+</sup></b> | <b>EtA2<sup>+</sup></b> | <b>EtA3<sup>+</sup></b> | <b>EtA4<sup>+</sup></b> |
|--------------|-------------------------|-------------------------|-------------------------|-------------------------|
| <b>g'Gg'</b> | 8.940                   | 9.062                   | 9.066                   | 9.042                   |
| <b>gGt</b>   | 8.882                   | 9.004                   | 9.008                   | 8.984                   |
| <b>gGg'</b>  | 8.910                   | 9.032                   | 9.036                   | 9.012                   |
| <b>gTg</b>   | 8.892                   | 9.014                   | 9.018                   | 8.994                   |
